# Supplementary material for: Cation–π interactions in protein–ligand binding: theory and data-mining reveal different roles for lysine and arginine
Source: PubMed Central journal article supplement — Chem Sci. 2018 Jan 31;9(10):2655–65. doi: 10.1039/c7sc04905f (PMC5903419; doi:10.1039/c7sc04905f), 2018-01-31
Supplement: SC-009-C7SC04905F-s002.pdf [file SC-009-C7SC04905F-s002.pdf]

Supporting Information for:

**Cation– $\pi$  interactions in protein-ligand binding: theory and data-mining reveal different roles for lysine and arginine**

Kiran Kumar<sup>a†</sup> and Shin M. Woo<sup>a†</sup>, Thomas Siu<sup>a</sup>, Wilian A. Cortopassi<sup>a</sup>, Fernanda Duarte<sup>b</sup>, and Robert S. Paton<sup>a\*</sup>

<sup>a</sup>*Chemistry Research Laboratory, University of Oxford, 12 Mansfield Road, Oxford OX1 3TA, UK*

<sup>b</sup>*EaStCHEM School of Chemistry, University of Edinburgh, Joseph Black Building, David Brewster Road, Edinburgh EH9 3FJ, UK*

<sup>†</sup>These authors contributed equally to this work

fernanda.duarte@ed.ac.uk; robert.paton@chem.ox.ac.uk

**Table of contents**

|    |                                                                                                     |    |
|----|-----------------------------------------------------------------------------------------------------|----|
| 1  | Full citation 50.....                                                                               | 2  |
| 2  | [C <sub>6</sub> H <sub>6</sub> ][Na] <sup>+</sup> potential energy curve: basis set dependency..... | 3  |
| 3  | PLIP cation– $\pi$ interaction geometric criteria.....                                              | 4  |
| 4  | Interactions involving polycyclic aromatic rings.....                                               | 5  |
| 5  | van der Waals Surface Representations.....                                                          | 6  |
| 6  | Minimum energy structures.....                                                                      | 7  |
| 7  | SAPT2+3 energy decomposition.....                                                                   | 8  |
| 8  | DLPNO-CCSD(T)/aug-cc-pVTZ calculated values .....                                                   | 9  |
| 9  | Orientations of Arg-aromatic interactions .....                                                     | 17 |
| 10 | Lys-aromatic interactions.....                                                                      | 17 |
| 11 | Effect of methylation.....                                                                          | 18 |
| 12 | Cartesian coordinates .....                                                                         | 19 |

## 1 Full citation 50

Gaussian 09, Revision D.01, M. J. Frisch, G. W. Trucks, H. B. Schlegel, G. E. Scuseria, M. A. Robb, J. R. Cheeseman, G. Scalmani, V. Barone, G. A. Petersson, H. Nakatsuji, X. Li, M. Caricato, A. Marenich, J. Bloino, B. G. Janesko, R. Gomperts, B. Mennucci, H. P. Hratchian, J. V. Ortiz, A. F. Izmaylov, J. L. Sonnenberg, D. Williams-Young, F. Ding, F. Lipparini, F. Egidi, J. Goings, B. Peng, A. Petrone, T. Henderson, D. Ranasinghe, V. G. Zakrzewski, J. Gao, N. Rega, G. Zheng, W. Liang, M. Hada, M. Ehara, K. Toyota, R. Fukuda, J. Hasegawa, M. Ishida, T. Nakajima, Y. Honda, O. Kitao, H. Nakai, T. Vreven, K. Throssell, J. A. Montgomery, Jr., J. E. Peralta, F. Ogliaro, M. Bearpark, J. J. Heyd, E. Brothers, K. N. Kudin, V. N. Staroverov, T. Keith, R. Kobayashi, J. Normand, K. Raghavachari, A. Rendell, J. C. Burant, S. S. Iyengar, J. Tomasi, M. Cossi, J. M. Millam, M. Klene, C. Adamo, R. Cammi, J. W. Ochterski, R. L. Martin, K. Morokuma, O. Farkas, J. B. Foresman, and D. J. Fox, Gaussian, Inc., Wallingford CT, 2016.

## 2 [C<sub>6</sub>H<sub>6</sub>][Na]<sup>+</sup> potential energy curve: basis set dependency

Figure S1. CCSD(T)/aug-cc-pVXZ potential energy curve of the [C<sub>6</sub>H<sub>6</sub>][Na]<sup>+</sup> complex

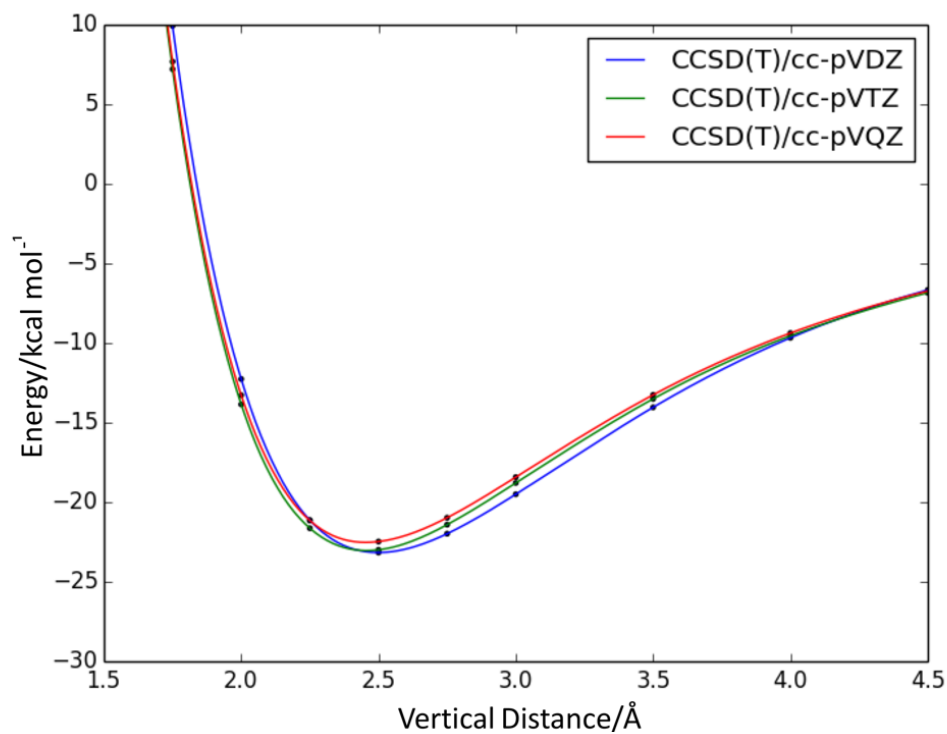

| Basis Set   | Equilibrium R <sub>z</sub> (Å) | E <sub>int</sub> (kcal mol <sup>-1</sup> ) |
|-------------|--------------------------------|--------------------------------------------|
| aug-cc-pVDZ | 2.50                           | -23.2                                      |
| aug-cc-pVTZ | 2.45                           | -23.0                                      |
| aug-cc-pVQZ | 2.45                           | -22.5                                      |

### 3 PLIP cation- $\pi$ interaction geometric criteria

**Figure S2.** Geometric criteria used define a cation- $\pi$  interaction. A distance cut-off of 6.0 Å (blue sphere) was defined from the centroid of the aromatic ring, along with a 2.3 Å horizontal-offset cut-off in the plane of the ring (purple cylinder).

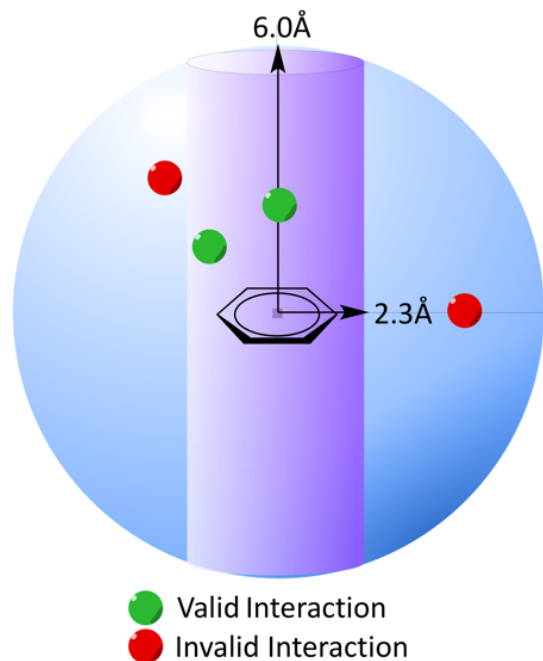

## 4 Interactions involving polycyclic aromatic rings

**Figure S3.** Examples of polycyclic aromatic rings further sub-classified as a) fused bicyclic ligand, b) sandwich complex, and c) bridged bicyclic ligand cation- $\pi$  interaction.

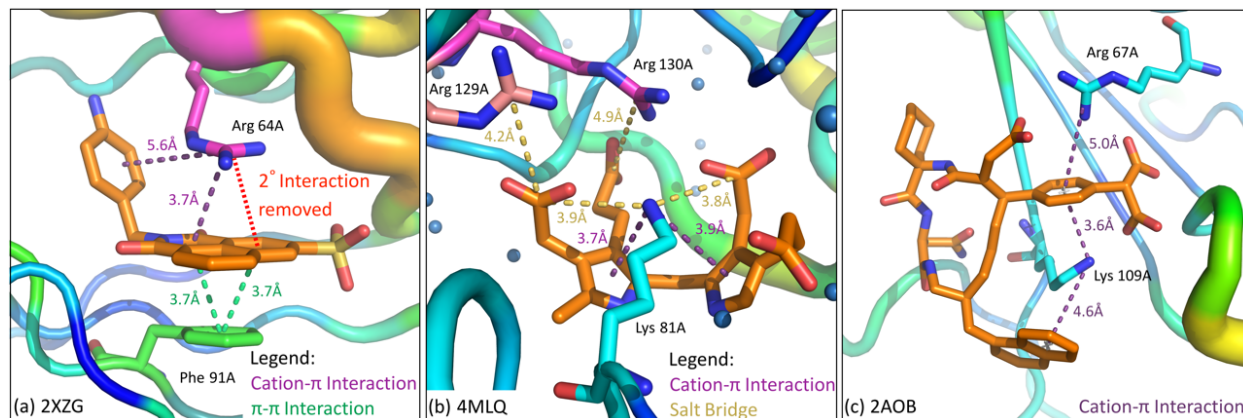

## 5 van der Waals Surface Representations

**Figure S4.** Van der Waals surfaces generated using atomic Bondi radii, for minimum energy geometries along the potential energy curve.

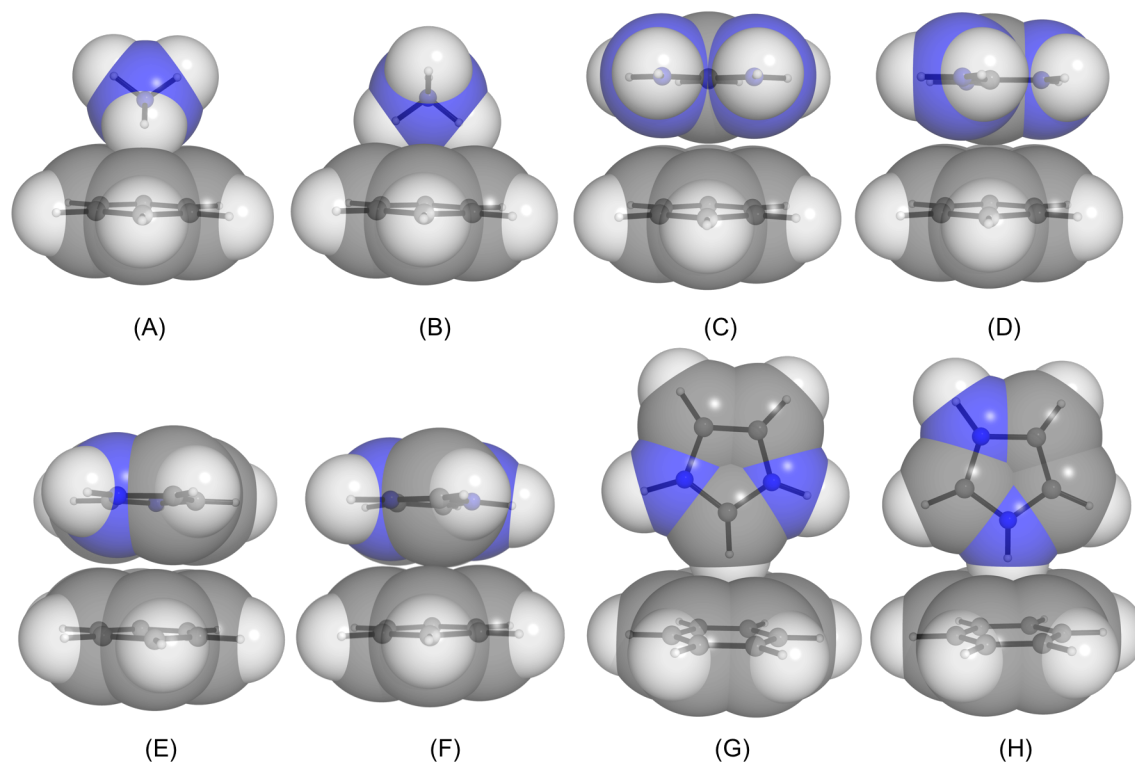

## 6 Minimum energy structures

**Figure S5.** SAPT2+3/aug-cc-pVDZ and DLPNO-CCSD(T)/aug-cc-pVTZ  $E_{\text{int}}$  (kcal mol<sup>-1</sup>) at the minimum along the potential energy curve. Horizontal offset,  $R_y = 0.00$  (Å) for all geometries.

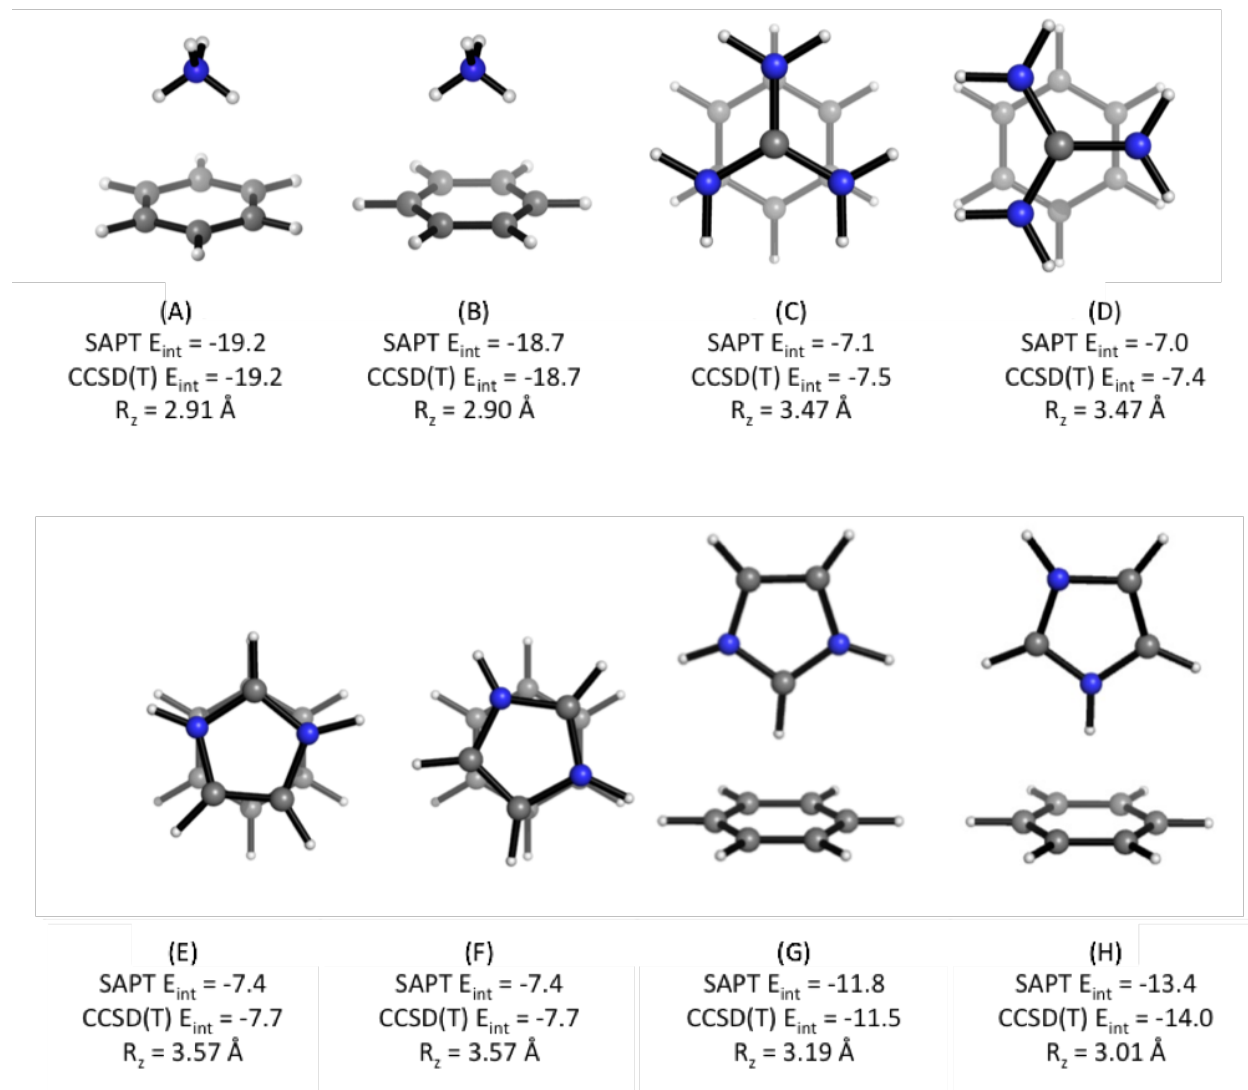

## 7 SAPT2+3 energy decomposition

**Table S1.** SAPT2+3/aug-cc-pVDZ decomposition of  $E_{\text{int}}$  values and DLPNO-CCSD(T)/aug-cc-pVTZ.

Energies in kcal mol<sup>-1</sup>.

| Complex | Electrostatic<br>( $E_{\text{ele}}$ ) | Exchange<br>( $E_{\text{ee}}$ ) | Induction<br>( $E_{\text{ind}}$ ) | Dispersion<br>( $E_{\text{disp}}$ ) | SAPT2+3 $E_{\text{int}}$ | CCSD(T) $E_{\text{int}}$ |
|---------|---------------------------------------|---------------------------------|-----------------------------------|-------------------------------------|--------------------------|--------------------------|
| A       | -13.3                                 | 14.9                            | -14.2                             | -6.6                                | -19.2                    | -19.2                    |
| B       | -13.2                                 | 14.4                            | -13.5                             | -6.5                                | -18.8                    | -18.7                    |
| C       | -5.2                                  | 6.2                             | -2.3                              | -5.9                                | -7.2                     | -7.5                     |
| D       | -5.8                                  | 7.9                             | -2.4                              | -6.6                                | -6.9                     | -7.4                     |
| E       | -5.1                                  | 6.4                             | -2.3                              | -6.5                                | -7.5                     | -7.7                     |
| F       | -4.5                                  | 5.0                             | -2.1                              | -5.7                                | -7.3                     | -7.7                     |
| G       | -7.9                                  | 9.5                             | -6.9                              | -6.5                                | -11.8                    | -11.5                    |
| H       | -8.8                                  | 10.9                            | -8.2                              | -7.3                                | -13.4                    | -14.0                    |



## 8 DLPNO-CCSD(T)/aug-cc-pVTZ calculated values

**Table S2.**  $R_z$  (Å) and DLPNO-CCSD(T)/aug-cc-pVTZ calculated  $E_{\text{monomer}}$ ,  $E_{\text{complex}}$ , and  $E_{\text{int}}$  of cation- $\pi$  complexes (A) and (B).  $E_{\pi} = -231.796893$  a.u in the gas phase.

|           | (A)<br>$\text{NH}_4^+$<br>$E_{\text{monomer}}$ (a.u)                         |                                               | (B)<br>$\text{NH}_4^+$<br>$E_{\text{monomer}}$ (a.u)                         |                                               |
|-----------|------------------------------------------------------------------------------|-----------------------------------------------|------------------------------------------------------------------------------|-----------------------------------------------|
|           | -56.813109                                                                   |                                               | -56.814684                                                                   |                                               |
| $R_z$ (Å) | (A)<br>$[\text{C}_6\text{H}_6][\text{NH}_4]^+$<br>$E_{\text{complex}}$ (a.u) | $E_{\text{int}}$<br>(kcal mol <sup>-1</sup> ) | (B)<br>$[\text{C}_6\text{H}_6][\text{NH}_4]^+$<br>$E_{\text{complex}}$ (a.u) | $E_{\text{int}}$<br>(kcal mol <sup>-1</sup> ) |
| 1.50      | -288.087765                                                                  | 327.71                                        | -288.135143                                                                  | 298.72                                        |
| 2.00      | -288.371717                                                                  | 149.53                                        | -288.389025                                                                  | 139.41                                        |
| 2.25      | -288.522669                                                                  | 54.80                                         | -288.529215                                                                  | 51.43                                         |
| 2.50      | -288.597020                                                                  | 8.15                                          | -288.599536                                                                  | 7.31                                          |
| 2.75      | -288.628866                                                                  | -11.84                                        | -288.629767                                                                  | -11.66                                        |
| 3.00      | -288.639265                                                                  | -18.36                                        | -288.639891                                                                  | -18.02                                        |
| 3.25      | -288.640241                                                                  | -18.98                                        | -288.640565                                                                  | -18.44                                        |
| 3.50      | -288.637301                                                                  | -17.13                                        | -288.637826                                                                  | -16.72                                        |
| 3.75      | -288.633348                                                                  | -14.65                                        | -288.634031                                                                  | -14.34                                        |
| 4.00      | -288.629538                                                                  | -12.26                                        | -288.630299                                                                  | -12.00                                        |
| 4.25      | -288.626201                                                                  | -10.17                                        | -288.627068                                                                  | -9.97                                         |
| 4.50      | -288.623434                                                                  | -8.43                                         | -288.624362                                                                  | -8.27                                         |
| 5.00      | -288.621219                                                                  | -7.04                                         | -288.622198                                                                  | -6.91                                         |
| 6.00      | -288.617993                                                                  | -5.01                                         | -288.619041                                                                  | -4.93                                         |

**Table S3.**  $R_z$  (Å) CPCM-MP2/cc-pVTZ calculated  $E_{\text{monomer}}$ ,  $E_{\text{complex}}$ , and  $E_{\text{int}}$  of cation- $\pi$  complex (A) in diethyl ether (dielectric constant = 4.2) and water (dielectric constant = 78.4).

| $R_z$ (Å) | $E_{\text{int,ether}}$<br>(kcal mol <sup>-1</sup> ) | $E_{\text{int,water}}$<br>(kcal mol <sup>-1</sup> ) |
|-----------|-----------------------------------------------------|-----------------------------------------------------|
| 1.50      | 357.15                                              | 365.71                                              |
| 2.00      | 170.21                                              | 175.95                                              |
| 2.25      | 74.65                                               | 80.04                                               |
| 2.50      | 30.83                                               | 37.05                                               |
| 2.75      | 8.99                                                | 14.57                                               |
| 3.00      | 0.40                                                | 5.31                                                |
| 3.25      | -2.56                                               | 1.62                                                |
| 3.50      | -3.63                                               | -0.32                                               |
| 3.75      | -3.54                                               | -0.91                                               |
| 4.00      | -3.30                                               | -1.26                                               |
| 4.25      | -2.71                                               | -0.97                                               |
| 4.50      | -2.19                                               | -0.68                                               |
| 5.00      | -1.80                                               | -0.50                                               |
| 6.00      | -1.25                                               | -0.27                                               |

**Table S4.**  $R_z$  (Å) and DLPNO-CCSD(T)/aug-cc-pVTZ calculated  $E_{\text{monomer}}$ ,  $E_{\text{complex}}$ , and  $E_{\text{int}}$  of cation- $\pi$  complexes (C) and (D).  $E_{\pi} = -231.800567$  a.u.

| $R_z$ (Å) | (C)                                                                                      | $E_{\text{int}}$<br>(kcal mol <sup>-1</sup> ) | (D)                                                                                      | $E_{\text{int}}$<br>(kcal mol <sup>-1</sup> ) |
|-----------|------------------------------------------------------------------------------------------|-----------------------------------------------|------------------------------------------------------------------------------------------|-----------------------------------------------|
|           | $E_{\text{monomer}}$ (a.u.)                                                              |                                               | $E_{\text{monomer}}$ (a.u.)                                                              |                                               |
|           | (C)<br>Gdm <sup>+</sup><br>$E_{\text{monomer}}$ (a.u.)<br>-205.441043                    |                                               | (D)<br>Gdm <sup>+</sup><br>$E_{\text{monomer}}$ (a.u.)<br>-205.441043                    |                                               |
|           | (C)<br>[C <sub>6</sub> H <sub>6</sub> ][Gdm] <sup>+</sup><br>$E_{\text{complex}}$ (a.u.) |                                               | (D)<br>[C <sub>6</sub> H <sub>6</sub> ][Gdm] <sup>+</sup><br>$E_{\text{complex}}$ (a.u.) |                                               |
| 1.50      | -436.313400                                                                              | 582.46                                        | -436.209354                                                                              | 647.75                                        |
| 2.00      | -436.969408                                                                              | 170.81                                        | -436.966130                                                                              | 172.87                                        |
| 2.25      | -437.117579                                                                              | 77.83                                         | -437.116097                                                                              | 78.76                                         |
| 2.50      | -437.193159                                                                              | 30.40                                         | -437.193079                                                                              | 30.45                                         |
| 2.75      | -437.230276                                                                              | 7.11                                          | -437.230030                                                                              | 7.27                                          |
| 3.00      | -437.246628                                                                              | -3.15                                         | -437.245988                                                                              | -2.75                                         |
| 3.25      | -437.252469                                                                              | -6.81                                         | -437.252207                                                                              | -6.65                                         |
| 3.50      | -437.253562                                                                              | -7.50                                         | -437.253323                                                                              | -7.35                                         |
| 3.75      | -437.252640                                                                              | -6.92                                         | -437.252575                                                                              | -6.88                                         |
| 4.00      | -437.251313                                                                              | -6.09                                         | -437.251253                                                                              | -6.05                                         |
| 4.50      | -437.248719                                                                              | -4.46                                         | -437.248720                                                                              | -4.46                                         |
| 5.00      | -437.246811                                                                              | -3.26                                         | -437.246811                                                                              | -3.26                                         |
| 6.00      | -437.244694                                                                              | -1.93                                         | -437.245540                                                                              | -2.47                                         |

**Table S5.**  $R_z$  (Å) and CPCM-MP2/cc-pVTZ calculated  $E_{\text{monomer}}$ ,  $E_{\text{complex}}$ , and  $E_{\text{int}}$  of cation- $\pi$  complex (C) in diethyl ether (dielectric constant = 4.2) and water (dielectric constant = 78.4).

| $R_z$ (Å) | $E_{\text{int,ether}}$<br>(kcal mol <sup>-1</sup> ) | $E_{\text{int,water}}$<br>(kcal mol <sup>-1</sup> ) |
|-----------|-----------------------------------------------------|-----------------------------------------------------|
| 1.50      | 549.63                                              | 534.76                                              |
| 2.00      | 170.18                                              | 168.55                                              |
| 2.25      | 80.24                                               | 79.92                                               |
| 2.50      | 34.52                                               | 34.93                                               |
| 2.75      | 12.05                                               | 12.85                                               |
| 3.00      | 2.02                                                | 3.01                                                |
| 3.25      | -1.84                                               | -0.80                                               |
| 3.50      | -3.02                                               | -2.04                                               |
| 3.75      | -3.17                                               | -2.34                                               |
| 4.00      | -2.90                                               | -2.18                                               |
| 4.50      | -2.42                                               | -1.91                                               |
| 5.00      | -1.60                                               | -1.17                                               |
| 6.00      | -0.57                                               | -0.20                                               |

**Table S6.**  $R_z$  (Å) and DLPNO-CCSD(T)/aug-cc-pVTZ calculated  $E_{\text{monomer}}$ ,  $E_{\text{complex}}$ , and  $E_{\text{int}}$  of cation- $\pi$  complexes (E) and (F).  $E_{\pi} = -231.800567$  a.u.

|           | (E)<br>$\text{Imi}^+$                                                        |                                               | (F)<br>$\text{Imi}^+$                                                        |                                               |
|-----------|------------------------------------------------------------------------------|-----------------------------------------------|------------------------------------------------------------------------------|-----------------------------------------------|
|           | $E_{\text{monomer}}$ (a.u.)                                                  |                                               | $E_{\text{monomer}}$ (a.u.)                                                  |                                               |
|           | -226.184887                                                                  |                                               | -226.184887                                                                  |                                               |
| $R_z$ (Å) | (E)<br>$[\text{C}_6\text{H}_6][\text{Imi}]^+$<br>$E_{\text{complex}}$ (a.u.) | $E_{\text{int}}$<br>(kcal mol <sup>-1</sup> ) | (F)<br>$[\text{C}_6\text{H}_6][\text{Imi}]^+$<br>$E_{\text{complex}}$ (a.u.) | $E_{\text{int}}$<br>(kcal mol <sup>-1</sup> ) |
| 1.50      | -457.575476                                                                  | 519.90                                        | -457.604789                                                                  | 516.01                                        |
| 2.00      | -457.866601                                                                  | 236.18                                        | -457.900486                                                                  | 234.31                                        |
| 2.50      | -457.977400                                                                  | 47.65                                         | -457.992507                                                                  | 47.53                                         |
| 2.75      | -457.995793                                                                  | 14.54                                         | -458.004717                                                                  | 14.56                                         |
| 3.00      | -458.002651                                                                  | -0.19                                         | -458.007788                                                                  | -0.22                                         |
| 3.25      | -458.003654                                                                  | -6.04                                         | -458.006431                                                                  | -6.04                                         |
| 3.50      | -458.002303                                                                  | -7.67                                         | -458.003901                                                                  | -7.62                                         |
| 3.75      | -458.000136                                                                  | -7.44                                         | -458.001031                                                                  | -7.42                                         |
| 4.00      | -457.997868                                                                  | -6.58                                         | -457.998407                                                                  | -6.57                                         |
| 4.50      | -457.994090                                                                  | -4.77                                         | -457.994383                                                                  | -4.78                                         |
| 5.00      | -457.991563                                                                  | -3.46                                         | -457.991759                                                                  | -3.47                                         |
| 6.00      | -457.988890                                                                  | -2.00                                         | -457.988981                                                                  | -2.01                                         |

**Table S7.**  $R_z$  (Å) and SMD-MP2/cc-pVTZ calculated  $E_{\text{monomer}}$ ,  $E_{\text{complex}}$ , and  $E_{\text{int}}$  of cation- $\pi$  complex (E) in diethyl ether (dielectric constant = 4.2) and water (dielectric constant = 78.4).

| $R_z$ (Å) | $E_{\text{int,ether}}$<br>(kcal mol <sup>-1</sup> ) | $E_{\text{int,water}}$<br>(kcal mol <sup>-1</sup> ) |
|-----------|-----------------------------------------------------|-----------------------------------------------------|
| 1.50      | 497.78                                              | 488.25                                              |
| 2.00      | 242.89                                              | 243.80                                              |
| 2.50      | 51.76                                               | 52.30                                               |
| 2.75      | 19.34                                               | 20.20                                               |
| 3.00      | 4.80                                                | 5.81                                                |
| 3.25      | -1.18                                               | -0.14                                               |
| 3.50      | -3.17                                               | -2.16                                               |
| 3.75      | -3.47                                               | -2.57                                               |
| 4.00      | -3.17                                               | -2.40                                               |
| 4.50      | -2.15                                               | -1.53                                               |
| 5.00      | -1.38                                               | -0.87                                               |
| 6.00      | -0.63                                               | -0.26                                               |

**Table S8.**  $R_z$  (Å) and DLPNO-CCSD(T)/aug-cc-pVTZ calculated  $E_{\text{monomer}}$ ,  $E_{\text{complex}}$ , and  $E_{\text{int}}$  of cation- $\pi$  complexes (G) and (H).  $E_{\pi} = -231.800567$  a.u.

|           | (G)<br>Imi <sup>+</sup><br>$E_{\text{monomer}}$ (a.u.)<br>-226.184887                    |                                               | (H)<br>Imi <sup>+</sup><br>$E_{\text{monomer}}$ (a.u.)<br>-226.185434                    |                                               |
|-----------|------------------------------------------------------------------------------------------|-----------------------------------------------|------------------------------------------------------------------------------------------|-----------------------------------------------|
| $R_z$ (Å) | (G)<br>[C <sub>6</sub> H <sub>6</sub> ][Imi] <sup>+</sup><br>$E_{\text{complex}}$ (a.u.) | $E_{\text{int}}$<br>(kcal mol <sup>-1</sup> ) | (H)<br>[C <sub>6</sub> H <sub>6</sub> ][Imi] <sup>+</sup><br>$E_{\text{complex}}$ (a.u.) | $E_{\text{int}}$<br>(kcal mol <sup>-1</sup> ) |
| 1.50      | -457.156947                                                                              | 257.265055                                    | -457.163683                                                                              | 238.870967                                    |
| 2.00      | -457.609070                                                                              | 74.581396                                     | -457.612602                                                                              | 53.318206                                     |
| 2.50      | -457.909526                                                                              | 5.054003                                      | -457.910256                                                                              | -4.425725                                     |
| 2.75      | -457.962289                                                                              | -6.487940                                     | -457.962794                                                                              | -12.087740                                    |
| 3.00      | -457.985750                                                                              | -10.791220                                    | -457.986358                                                                              | -14.014867                                    |
| 3.25      | -457.995086                                                                              | -11.420705                                    | -457.995625                                                                              | -13.162981                                    |
| 3.50      | -457.997670                                                                              | -10.572985                                    | -457.998138                                                                              | -11.575549                                    |
| 3.75      | -457.997317                                                                              | -9.213249                                     | -457.997830                                                                              | -9.774355                                     |
| 4.00      | -457.995947                                                                              | -7.789787                                     | -457.996477                                                                              | -8.127922                                     |
| 4.50      | -457.993056                                                                              | -5.418769                                     | -457.993618                                                                              | -5.603050                                     |
| 5.00      | -457.990972                                                                              | -3.833049                                     | -457.991525                                                                              | -3.956115                                     |
| 6.00      | -457.988646                                                                              | -2.155779                                     | -457.989197                                                                              | -2.213165                                     |

**Table S9.**  $R_z$  (Å) SMD-MP2/cc-pVTZ calculated  $E_{\text{monomer}}$ ,  $E_{\text{complex}}$ , and  $E_{\text{int}}$  of cation- $\pi$  complex (**G**) in diethyl ether (dielectric constant = 4.2) and water (dielectric constant = 78.4).

| $R_z$ (Å) | $E_{\text{int,ether}}$<br>(kcal mol <sup>-1</sup> ) | $E_{\text{int,water}}$<br>(kcal mol <sup>-1</sup> ) |
|-----------|-----------------------------------------------------|-----------------------------------------------------|
| 1.50      | 274.93                                              | 280.05                                              |
| 2.00      | 89.45                                               | 93.69                                               |
| 2.50      | 19.45                                               | 23.52                                               |
| 2.75      | 7.44                                                | 11.36                                               |
| 3.00      | 2.46                                                | 6.17                                                |
| 3.50      | -2.27                                               | -0.14                                               |
| 4.00      | -2.94                                               | -1.38                                               |
| 4.50      | -2.48                                               | -1.12                                               |
| 5.00      | -1.61                                               | -0.58                                               |
| 6.00      | -1.04                                               | -0.26                                               |



## 9 Orientations of Arg-aromatic interactions

**Figure S6.** Empirical distribution of Arg-aromatic complexes found in PDB crystal structures. The interplanar angle between arginine and the aromatic ring is plotted against the intermolecular separation of the two groups. Relative abundance in bins of 10° are shown on the right.

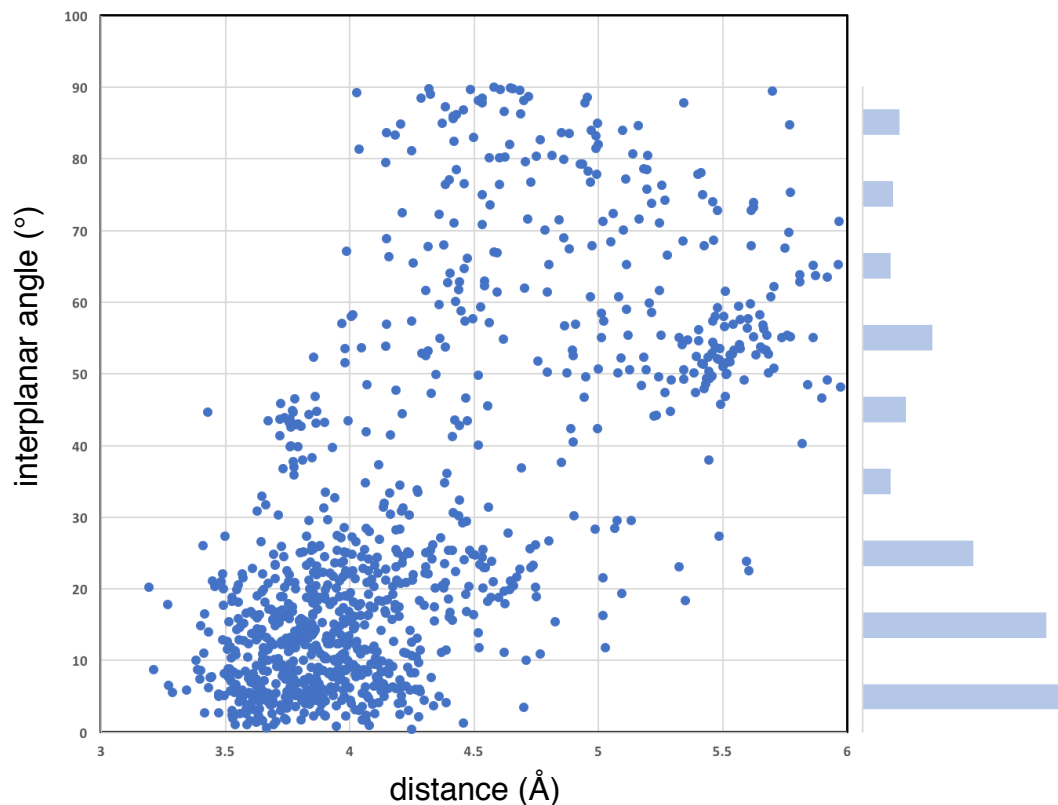

## 10 Lys-aromatic interactions

**Figure S7.** Empirical distribution of Lys-aromatic small molecule complexes found in PDB crystal structures. Orange points indicate aromatic system belongs to GTP, GDP, ATP, ADP, FAD, NAD, or derivatives.

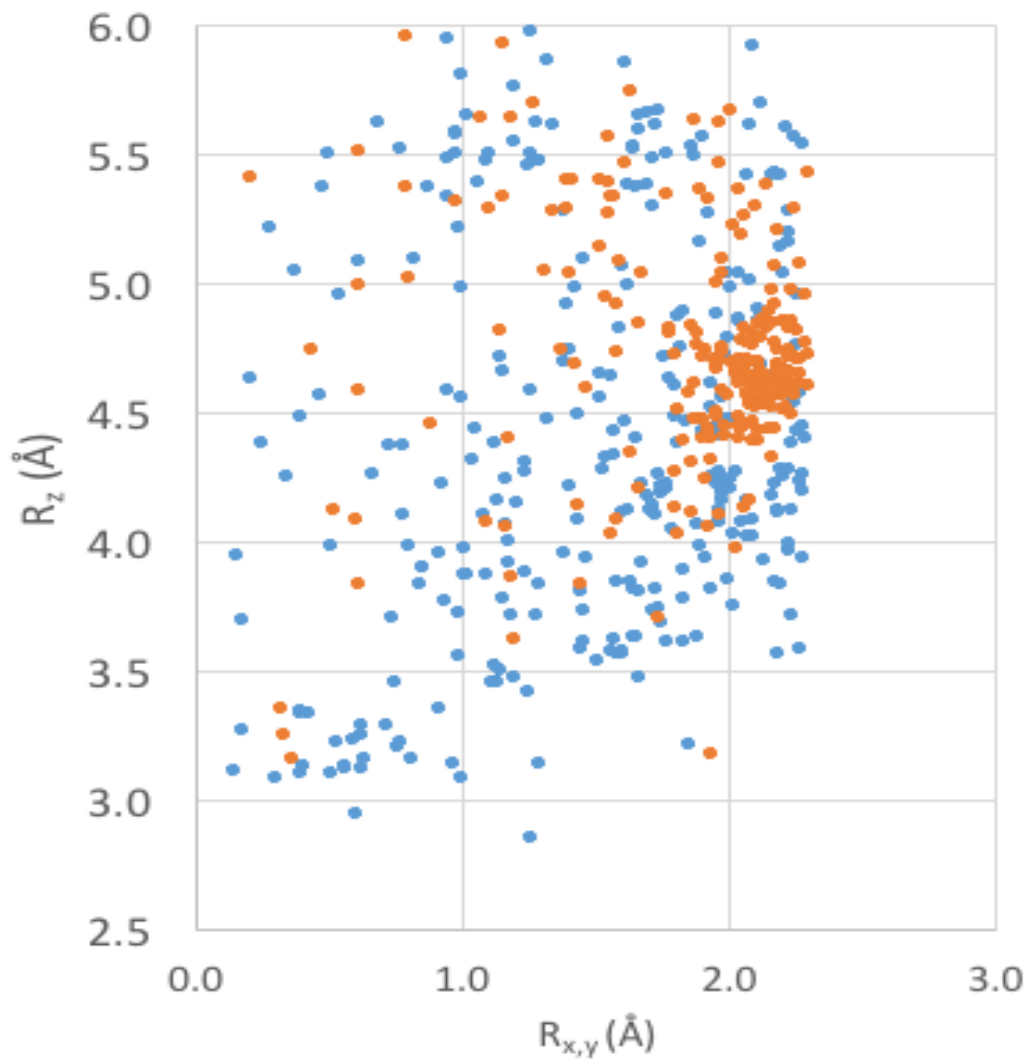

## 11 Effect of methylation

**Figure S8.** MP2/cc-pVTZ interaction energy ( $\text{kcal mol}^{-1}$ ) as a function of intermolecular separation of cation- $\pi$  complexes: in red,  $\text{NH}_4^+ \text{-C}_6\text{H}_6$  (complex A); in blue  $\text{CH}_3\text{NH}_3^+ \text{-C}_6\text{H}_6$ .

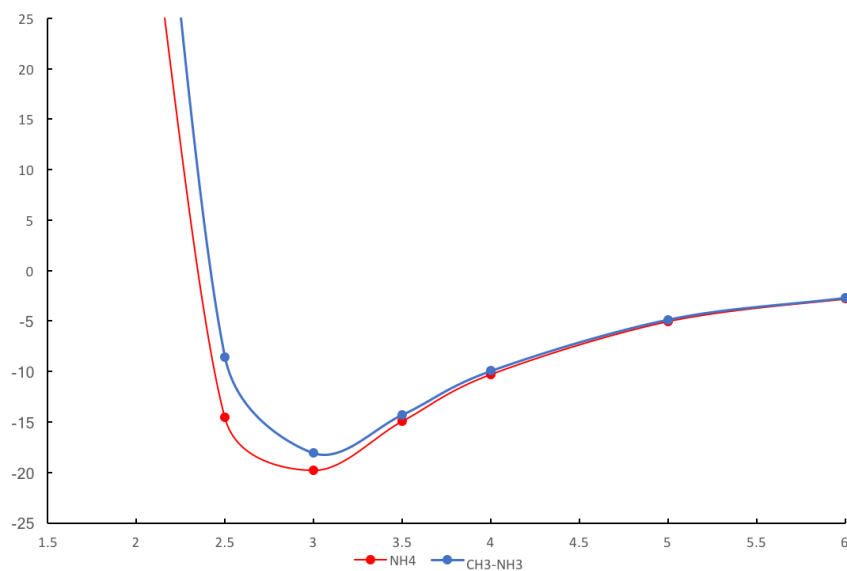

## 12 Cartesian coordinates

**Table S10.** Cartesian coordinates at DLPNO-CCSD(T)/aug-cc-pVTZ equilibrium separation.

| (A)  |           |           |          | (B)  |           |           |           |
|------|-----------|-----------|----------|------|-----------|-----------|-----------|
| Atom | X         | Y         | Z        | Atom | X         | Y         | Z         |
| C    | 1.196745  | 0.716602  | 0.000000 | C    | -1.208142 | -0.697418 | 0.000000  |
| C    | 0.000000  | 1.394554  | 0.000000 | C    | -1.208053 | 0.697572  | 0.000017  |
| C    | -1.196745 | 0.716602  | 0.000000 | C    | 0.000089  | 1.394991  | 0.000000  |
| C    | -1.196745 | -0.716602 | 0.000000 | C    | 1.208142  | 0.697418  | 0.000017  |
| C    | 0.000000  | -1.394554 | 0.000000 | C    | 1.208053  | -0.697572 | 0.000000  |
| C    | 1.196745  | -0.716602 | 0.000000 | C    | -0.000089 | -1.394991 | 0.000017  |
| H    | 2.140067  | 1.281657  | 0.000000 | H    | -2.160467 | -1.247163 | -0.000025 |
| H    | 0.000000  | 2.494008  | 0.000000 | H    | -2.160308 | 1.247438  | 0.000006  |
| H    | -2.140067 | 1.281657  | 0.000000 | H    | 0.000159  | 2.494601  | -0.000025 |
| H    | -2.140067 | -1.281657 | 0.000000 | H    | 2.160467  | 1.247163  | 0.000006  |
| H    | 0.000000  | -2.494008 | 0.000000 | H    | 2.160308  | -1.247438 | -0.000025 |
| H    | 2.140067  | -1.281657 | 0.000000 | H    | -0.000159 | -2.494601 | 0.000006  |
| --   |           |           |          | --   |           |           |           |
| H    | -0.841770 | 0.004911  | 3.501509 | H    | -0.000831 | -0.835956 | 3.497879  |
| H    | 0.825367  | 0.004911  | 3.501509 | H    | -0.000831 | 0.839242  | 3.497879  |
| H    | -0.008201 | -0.790460 | 2.244923 | H    | 0.819724  | 0.001643  | 2.277463  |
| H    | -0.008201 | 0.800282  | 2.244923 | H    | -0.821385 | 0.001643  | 2.277463  |

|   |           |          |          |   |           |          |          |
|---|-----------|----------|----------|---|-----------|----------|----------|
| N | -0.008201 | 0.004911 | 2.897443 | N | -0.000831 | 0.001643 | 2.899513 |
|---|-----------|----------|----------|---|-----------|----------|----------|

| (C)  |           |           |          | (D)  |           |           |           |
|------|-----------|-----------|----------|------|-----------|-----------|-----------|
| Atom | X         | Y         | Z        | Atom | X         | Y         | Z         |
| C    | 1.208063  | 0.697555  | 0.000000 | C    | -1.208142 | -0.697418 | 0.000000  |
| C    | -0.000068 | 1.394991  | 0.000000 | C    | -1.208053 | 0.697572  | 0.000017  |
| C    | -1.208132 | 0.697436  | 0.000000 | C    | 0.000089  | 1.394991  | 0.000000  |
| C    | -1.208063 | -0.697555 | 0.000000 | C    | 1.208142  | 0.697418  | 0.000017  |
| C    | 0.000068  | -1.394991 | 0.000000 | C    | 1.208053  | -0.697572 | 0.000000  |
| C    | 1.208132  | -0.697436 | 0.000000 | C    | -0.000089 | -1.394991 | 0.000017  |
| H    | 2.160327  | 1.247406  | 0.000000 | H    | -2.160467 | -1.247163 | -0.000025 |
| H    | -0.000122 | 2.494601  | 0.000000 | H    | -2.160308 | 1.247438  | 0.000006  |
| H    | -2.160449 | 1.247195  | 0.000000 | H    | 0.000159  | 2.494601  | -0.000025 |
| H    | -2.160327 | -1.247406 | 0.000000 | H    | 2.160467  | 1.247163  | 0.000006  |
| H    | 0.000122  | -2.494601 | 0.000000 | H    | 2.160308  | -1.247438 | -0.000025 |
| H    | 2.160449  | -1.247195 | 0.000000 | H    | -0.000159 | -2.494601 | 0.000006  |
| --   |           |           |          | --   |           |           |           |
| C    | 0.000009  | -0.004467 | 3.469280 | C    | 0.005219  | 0.030155  | 3.390492  |
| N    | 0.000074  | 1.324324  | 3.469280 | N    | -0.659177 | 1.180923  | 3.390494  |
| H    | 0.859321  | 1.844780  | 3.469280 | H    | -1.663535 | 1.202043  | 3.390475  |
| H    | -0.858985 | 1.845025  | 3.467144 | H    | -0.175547 | 2.061386  | 3.392650  |
| N    | -1.150644 | -0.668872 | 3.472194 | N    | 1.334012  | 0.030155  | 3.390494  |
| H    | -2.031063 | -0.185232 | 3.477093 | H    | 1.854481  | 0.889394  | 3.390475  |
| H    | -1.171905 | -1.673176 | 3.469852 | H    | 1.854700  | -0.828912 | 3.392650  |
| N    | 1.150754  | -0.668858 | 3.466578 | N    | -0.659177 | -1.120613 | 3.390494  |
| H    | 1.172015  | -1.673150 | 3.469504 | H    | -0.175288 | -2.000972 | 3.390475  |
| H    | 2.031077  | -0.185070 | 3.462064 | H    | -1.663495 | -1.142009 | 3.392650  |

| (E)  |           |           |          | (F)  |           |           |          |
|------|-----------|-----------|----------|------|-----------|-----------|----------|
| Atom | X         | Y         | Z        | Atom | X         | Y         | Z        |
| C    | 1.208097  | 0.697495  | 0.000000 | C    | 1.208097  | 0.697495  | 0.000000 |
| C    | 0.000000  | 1.394991  | 0.000000 | C    | 0.000000  | 1.394991  | 0.000000 |
| C    | -1.208097 | 0.697495  | 0.000000 | C    | -1.208097 | 0.697495  | 0.000000 |
| C    | -1.208097 | -0.697495 | 0.000000 | C    | -1.208097 | -0.697495 | 0.000000 |
| C    | 0.000000  | -1.394991 | 0.000000 | C    | 0.000000  | -1.394991 | 0.000000 |
| C    | 1.208097  | -0.697495 | 0.000000 | C    | 1.208097  | -0.697495 | 0.000000 |
| H    | 2.160388  | 1.247300  | 0.000000 | H    | 2.160388  | 1.247300  | 0.000000 |
| H    | 0.000000  | 2.494601  | 0.000000 | H    | 0.000000  | 2.494601  | 0.000000 |
| H    | -2.160388 | 1.247300  | 0.000000 | H    | -2.160388 | 1.247300  | 0.000000 |
| H    | -2.160388 | -1.247300 | 0.000000 | H    | -2.160388 | -1.247300 | 0.000000 |
| H    | 0.000000  | -2.494601 | 0.000000 | H    | 0.000000  | -2.494601 | 0.000000 |
| H    | 2.160388  | -1.247300 | 0.000000 | H    | 2.160388  | -1.247300 | 0.000000 |
| --   |           |           |          | --   |           |           |          |
| C    | -0.765250 | -0.934781 | 3.564637 | C    | -1.165317 | -0.221730 | 3.645458 |
| C    | 0.632187  | -1.044655 | 3.564637 | C    | 0.829861  | 0.837989  | 3.645458 |
| C    | 0.070868  | 1.168401  | 3.564637 | C    | -0.547521 | 1.023828  | 3.645458 |
| N    | -1.100118 | 0.416132  | 3.564637 | N    | -1.008955 | 1.893175  | 3.645458 |
| H    | -2.014767 | 0.779644  | 3.564637 | H    | -2.248569 | -0.316902 | 3.645458 |
| H    | -1.529992 | -1.710457 | 3.564637 | H    | -0.330245 | -2.283498 | 3.645458 |
| H    | 1.206171  | -1.965184 | 3.564637 | H    | 2.068940  | -1.009326 | 3.645458 |
| H    | 2.212152  | 0.563973  | 3.500000 | H    | 1.515362  | 1.682469  | 3.645458 |
| H    | 0.047231  | 2.257376  | 3.564637 | H    | 1.092418  | -0.538951 | 3.645458 |
| N    | 1.162328  | 0.288689  | 3.564637 | N    | -0.172510 | -1.210729 | 3.645458 |

| (G)  |           |           |          | (H)  |           |           |          |
|------|-----------|-----------|----------|------|-----------|-----------|----------|
| Atom | X         | Y         | Z        | Atom | X         | Y         | Z        |
| C    | 1.208097  | 0.697495  | 0.000000 | C    | -0.000001 | 0.731133  | 5.333897 |
| C    | 0.000000  | 1.394991  | 0.000000 | C    | -0.000002 | -0.670139 | 5.370485 |
| C    | -1.208097 | 0.697495  | 0.000000 | C    | 0.000008  | 0.006232  | 3.189839 |
| C    | -1.208097 | -0.697495 | 0.000000 | C    | 0.000005  | 1.136243  | 4.002362 |
| C    | 0.000000  | -1.394991 | 0.000000 | C    | 0.000006  | 2.068663  | 3.687216 |
| C    | 1.208097  | -0.697495 | 0.000000 | C    | -0.000005 | 1.454230  | 6.148534 |
| H    | 2.160388  | 1.247300  | 0.000000 | H    | -0.000006 | -1.291514 | 6.259712 |
| H    | 0.000000  | 2.494601  | 0.000000 | H    | 0.000006  | -2.163291 | 3.681594 |
| H    | -2.160388 | 1.247300  | 0.000000 | H    | 0.000013  | 0.086830  | 2.103593 |
| H    | -2.160388 | -1.247300 | 0.000000 | H    | 0.000004  | -1.129772 | 4.011223 |
| H    | 0.000000  | -2.494601 | 0.000000 | H    | -0.000001 | 0.731133  | 5.333897 |
| H    | 2.160388  | -1.247300 | 0.000000 | H    | -0.000002 | -0.670139 | 5.370485 |
| --   |           |           |          | --   |           |           |          |
| C    | -0.000001 | 0.731133  | 5.333897 | C    | -0.000001 | 1.119680  | 3.796750 |
| C    | -0.000002 | -0.670139 | 5.370485 | C    | -0.000004 | 0.721460  | 5.140745 |
| C    | 0.000008  | 0.006232  | 3.189839 | C    | 0.000004  | -1.143448 | 3.823621 |
| N    | 0.000005  | 1.136243  | 4.002362 | N    | 0.000003  | -0.021500 | 3.000000 |
| H    | 0.000006  | 2.068663  | 3.687216 | H    | 0.000006  | -0.033087 | 2.015831 |
| H    | -0.000005 | 1.454230  | 6.148534 | H    | -0.000002 | 2.117895  | 3.360780 |
| H    | -0.000006 | -1.291514 | 6.259712 | H    | -0.000008 | 1.375150  | 6.006494 |
| H    | 0.000006  | -2.163291 | 3.681594 | H    | -0.000002 | -1.346180 | 6.038921 |
| H    | 0.000013  | 0.086830  | 2.103593 | H    | 0.000007  | -2.151623 | 3.411300 |
| N    | 0.000004  | -1.129772 | 4.011223 | N    | -0.000001 | -0.713310 | 5.157847 |
